# Supplementary material for: Design, synthesis and biocidal effect of novel amine N-halamine microspheres based on 2,2,6,6-tetramethyl-4-piperidinol as promising antibacterial agents
Source: Royal Society of Chemistry journal article supplement (doi:10.1039/c4ra08443h), 2014-01-01
Supplement: c4ra08443h1.pdf [file c4ra08443h1.pdf]

## Electronic Supplementary Information (ESI)

# **Design, synthesis and biocidal effect of novel amine *N*-halamine microspheres based on 2,2,6,6-tetramethyl-4-piperidinol as promising antibacterial agents**

Chenghao Li,<sup>a</sup> Linyan Xue,<sup>a</sup> Qian Cai,<sup>a</sup> Sarina Bao,<sup>a</sup> Tianyi Zhao,<sup>b</sup> Linghan Xiao,<sup>c</sup> Ge Gao,<sup>b</sup> Chokto Harnood<sup>a</sup> and Alideertu Dong<sup>\*a</sup>

*<sup>a</sup>College of Chemistry and Chemical Engineering, Inner Mongolia University, Hohhot 010021, People's Republic of China*

*<sup>b</sup>College of Chemistry, Jilin University, Changchun 130021, People's Republic of China*

*<sup>c</sup>College of Chemistry and Life Science, Changchun University of Technology, Changchun 130012, People's Republic of China*

\*Corresponding authors: Alideertu Dong

E-mail address: dongali@imu.edu.cn; Tel: +86 471 4992982.

B #26-29 RT: 0.69-0.77 AV: 4 SB: 32 0.16-0.64 , 0.80-1.14 NL: 3.46E6  
T: + c ESI Full ms [50.00-2000.00]

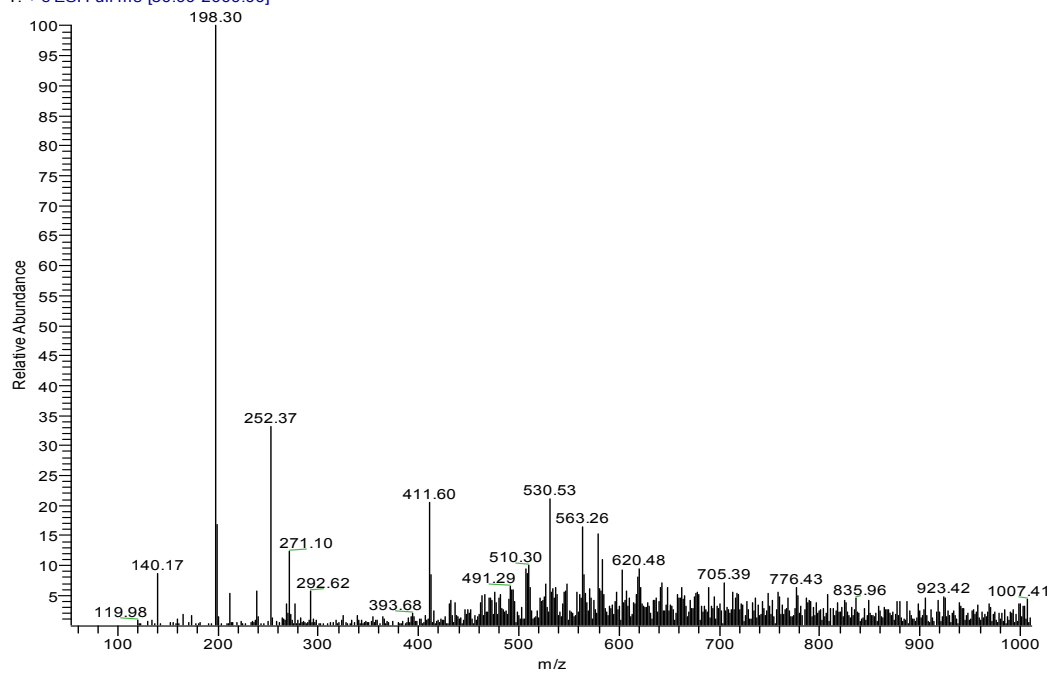

**Fig. S1.** Mass spectrogram of ATMP

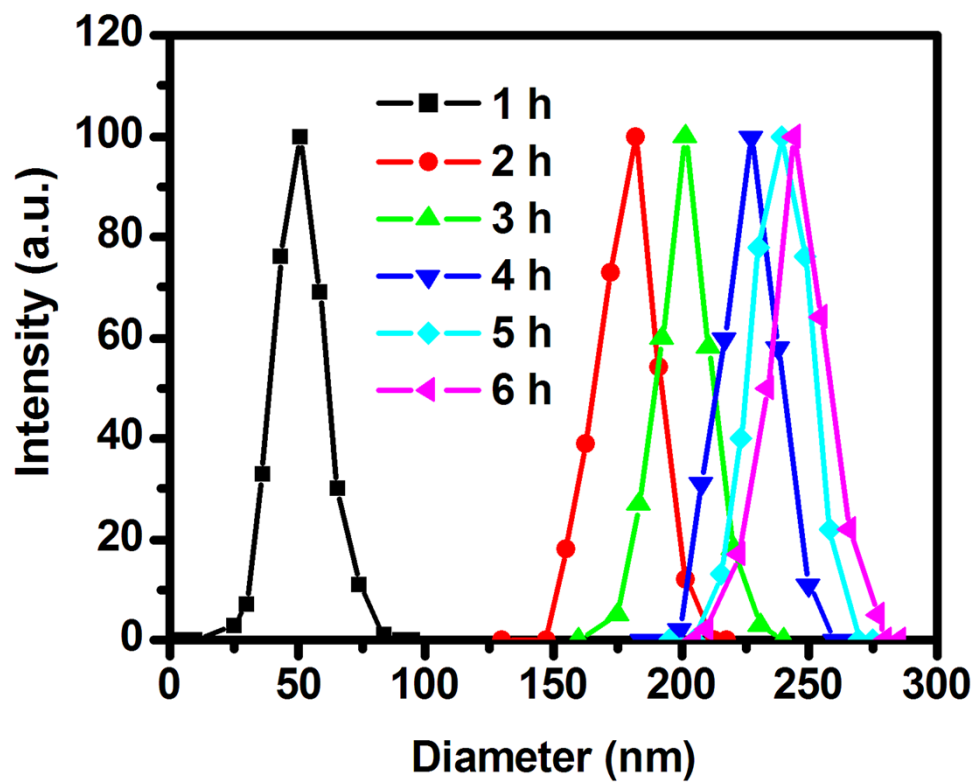

Fig. S2. Particle size distribution of poly(ATMP-co-MMA) microspheres with different copolymerization period.

**Table S1.** Dissociation constant of different *N*-halamine in aqueous solution

| <i>N</i> -halamine type | Dissociation reaction                                                              | Dissociation constant <sup>a</sup> |
|-------------------------|------------------------------------------------------------------------------------|------------------------------------|
| Imide                   | 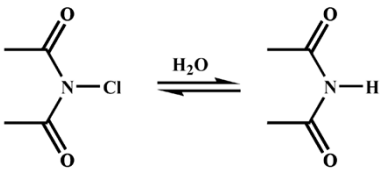  | $< 10^{-4}$                        |
| Amide                   |   | $< 10^{-9}$                        |
| Amine                   |  | $< 10^{-12}$                       |

<sup>a</sup>Dissociation constant was from references.<sup>1-4</sup>

**Table S2.** Particle size and surface area characteristics of poly(ATMP-co-MMA) microspheres formed with different copolymerization period

| Sample | Copolymerization period (h) | Particle size (nm) <sup>a</sup> |              | Surface area <sup>b</sup> (m <sup>2</sup> ·g <sup>-1</sup> ) |
|--------|-----------------------------|---------------------------------|--------------|--------------------------------------------------------------|
|        |                             | Size distribution               | Average size |                                                              |
| S1     | 1                           | 20-90                           | 50.7         | 118.3                                                        |
| S2     | 2                           | 150-210                         | 181.8        | 33.0                                                         |
| S3     | 3                           | 170-240                         | 201.9        | 29.7                                                         |
| S4     | 4                           | 190-250                         | 227.5        | 26.4                                                         |
| S5     | 5                           | 210-260                         | 239.2        | 25.1                                                         |
| S6     | 6                           | 210-280                         | 244.5        | 24.5                                                         |

<sup>a</sup>Particle size was determined by TEM images.

<sup>b</sup>The surface area was calculated based on the assumption that the particles are non-porous spheres with density of 1.0 g·cm<sup>-3</sup>. The calculation was performed according to the following equation:  $S = 6(D \cdot d)^{-1}$ , wherein  $S$  is the surface area (m<sup>2</sup>·g<sup>-1</sup>);  $D$  is the diameter (μm); and  $d$  is the density (g·cm<sup>-3</sup>) of the particles.<sup>5</sup>

**Table S3.** Minimum inhibitory concentration (MIC) of different products against *S. aureus*, *B. subtilis*, *E. coli*, and *P. aeruginosa*

| Sample                                                                                 | MIC (mg/mL)            |                    |                        |                      | Reference  |
|----------------------------------------------------------------------------------------|------------------------|--------------------|------------------------|----------------------|------------|
|                                                                                        | Gram-positive bacteria |                    | Gram-negative bacteria |                      |            |
|                                                                                        | <i>S. aureus</i>       | <i>B. subtilis</i> | <i>E. coli</i>         | <i>P. aeruginosa</i> |            |
| PSA@Fe <sub>3</sub> O <sub>4</sub> @SiO <sub>2</sub> - <i>N</i> -halamine <sup>a</sup> | 80                     | -                  | -                      | 60                   | 6          |
| HMNH NPs <sup>b</sup>                                                                  | 160                    | 160                | 160                    | 80                   | 7          |
| BAMNH NPs <sup>c</sup>                                                                 | 80                     | 80                 | 80                     | 40                   | 7          |
| H-NHFS NPs <sup>d</sup>                                                                | 160                    | -                  | -                      | 80                   | 8          |
| BA-NHFS NPs <sup>e</sup>                                                               | 40                     | -                  | -                      | 40                   | 8          |
| Amine <i>N</i> -halamine microspheres                                                  | 10                     | -                  | 10                     | -                    | This study |

<sup>a</sup>Amide *N*-halamine-immobilized PSA@Fe<sub>3</sub>O<sub>4</sub>@SiO<sub>2</sub> nanoparticles.

<sup>b</sup>Hydantoin-structural magnetic amide *N*-halamine nanoparticles.

<sup>c</sup>Barbituric acid-based magnetic imide *N*-halamine nanoparticles.

<sup>d</sup>Hydantoin-originated amide *N*-halamine-functionalized silica nanoparticles.

<sup>e</sup>Barbituric acid-originated imide *N*-halamine-functionalized silica nanoparticles.

**Table S4.** Oxidative chlorine content of amine *N*-halamine microspheres with different soaking period

| <b>Soaking period (h)<sup>a</sup></b> | <b>Oxidative chlorine (%)<sup>b</sup></b> | <b>Reduction (%)<sup>c</sup></b> |
|---------------------------------------|-------------------------------------------|----------------------------------|
| 0                                     | 1.17                                      | 0                                |
| 6                                     | 1.16                                      | 0.85                             |
| 12                                    | 1.16                                      | 0.85                             |
| 18                                    | 1.14                                      | 2.56                             |
| 24                                    | 1.11                                      | 5.13                             |
| 30                                    | 1.10                                      | 5.98                             |
| 36                                    | 1.08                                      | 7.69                             |
| 42                                    | 1.08                                      | 7.69                             |
| 48                                    | 1.07                                      | 8.55                             |

<sup>a</sup>Period since initial soaking.

<sup>b</sup>Oxidative chlorine content was determined by the iodometric/thiosulfate titration after a certain soaking age.

<sup>c</sup>Reduction percentage of oxidative chlorine after a certain soaking age.

### Supplementary References

- 1 K. Tan and S. K. Oberndorf, *J. Membrane Sci.*, 2007, **305**, 287-298.
- 2 A. Akdag, S. Okur, M. L. McKee and S. D. Worley, *J. Chem. Theory Comput.*, 2006, **2**, 879-884.
- 3 K. Barnes, J. Liang, R. Wu, S. D. Worley, J. Lee, R. M. Broughton and T. S. Huang, *Biomaterials*, 2006, **27**, 4825-4830.
- 4 O. Gutman, M. Natan, E. Banin and S. Margel, *Biomaterials*, 2014, **35**, 5079-5087.
- 5 M. Omer-Mizrahi and S. Margel, *J. Colloid Interface Sci.*, 2009, **329**, 228-234.
- 6 A. Dong, S. Lan, J. Huang, T. Wang, T. Zhao, L. Xiao, W. Wang, X. Zheng, G. Gao and Y. Chen, *ACS Appl. Mater. Interfaces*, 2011, **3**, 4228-4235.
- 7 A. Dong, Y. Sun, S. Lan, Q. Wang, Q. Cai, X. Qi, Y. Zhang, G. Gao, F. Liu and C. Harnooode, *ACS Appl. Mater. Interfaces*, 2013, **5**, 8125-8133.
- 8 A. Dong, M. Xue, S. Lan, Q. Wang, Y. Zhao, Y. Wang, Y. Zhang, G. Gao, F. Liu and C. Harnooode, *Colloid. Surf. B*, 2014, **113**, 450-457.
